# Supplementary material for: Identification of Lactobacillus Strains Capable of Fermenting Fructo-Oligosaccharides and Inulin
Source: MDPI journal article supplement (doi:10.3390/microorganisms9102020), 2021-09-24
Supplement: s1 [file s1]

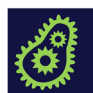

## Supplementary Materials:

**Table S1:** Growth of *Lactobacillus* and *Bifidobacterium* species in mMRS broth supplemented with 1% FOS or inulin.

| Bacteria                    | Source <sup>1</sup> | P95 (FOS)           |       | Synergy 1 (Inulin) |       |
|-----------------------------|---------------------|---------------------|-------|--------------------|-------|
|                             |                     | OD 600 <sup>2</sup> | ± SD  | OD600 <sup>2</sup> | ± SD  |
| <i>L. acidophilus</i> LA1   | DFF                 | 0.570               | 0.077 | 0.684              | 0.002 |
| <i>L. acidophilus</i> LA 6  | DFF                 | 0.432               | 0.081 | 0.545              | 0.195 |
| <i>L. acidophilus</i> LA 8  | DFF                 | 0.505               | 0.043 | 0.640              | 0.001 |
| <i>L. acidophilus</i> LA 10 | DFF                 | 0.537               | 0.087 | 0.581              | 0.142 |
| <i>L. acidophilus</i> LA 15 | DFF                 | 0.704               | 0.081 | 0.791              | 0.050 |
| <i>L. acidophilus</i> LA 30 | DFF                 | 0.549               | 0.086 | 0.663              | 0.001 |
| <i>L. acidophilus</i> B1912 | NRRL                | 0.548               | 0.077 | 0.657              | 0.028 |
| <i>L. acidophilus</i> RP32  | DFF                 | 0.432               | 0.036 | 0.557              | 0.001 |
| <i>L. amylophilus</i> B4437 | NRRL                | 0.496               | 0.013 | 0.661              | 0.053 |
| <i>L. amylophilus</i> B4481 | NRRL                | 0.410               | 0.113 | 0.527              | 0.064 |
| <i>L. amylovorus</i> B4540  | NRRL                | 0.532               | 0.138 | 0.647              | 0.081 |
| <i>L. amylovorus</i> B4548  | NRRL                | 0.436               | 0.024 | 0.495              | 0.022 |
| <i>L. animalis</i> B14176   | NRRL                | 0.487               | 0.010 | 0.399              | 0.011 |
| <i>L. animalis</i> B14177   | NRRL                | 0.602               | 0.076 | 0.679              | 0.135 |
| <i>L. arabinosis</i> B787   | NRRL                | 0.400               | 0.013 | 0.463              | 0.040 |
| <i>L. brevis</i> B4527      | NRRL                | 0.501               | 0.184 | 0.473              | 0.042 |
| <i>L. brevis</i> B1127      | NRRL                | 0.406               | 0.093 | 0.513              | 0.065 |
| <i>L. brevis</i> 3057       | DFF                 | 0.406               | 0.033 | 0.506              | 0.059 |
| <i>L. brevis</i> 1836       | DFF                 | 0.364               | 0.285 | 0.684              | 0.111 |
| <i>L. buchneri</i> LB5      | DFF                 | 0.654               | 0.076 | 0.716              | 0.101 |
| <i>L. buchneri</i> B1838    | NRRL                | 0.477               | 0.014 | 0.422              | 0.073 |
| <i>L. buchneri</i> B1860    | NRRL                | 0.736               | 0.095 | 0.890              | 0.114 |
| <i>L. bulgaricus</i> LB1    | DFF                 | 0.498               | 0.071 | 0.639              | 0.008 |
| <i>L. bulgaricus</i> LB6    | DFF                 | 0.494               | 0.009 | 0.670              | 0.051 |
| <i>L. bulgaricus</i> LB11   | DFF                 | 0.537               | 0.030 | 0.670              | 0.080 |
| <i>L. bulgaricus</i> LB12   | DFF                 | 0.389               | 0.083 | 0.524              | 0.107 |
| <i>L. bulgaricus</i> LB15   | DFF                 | 0.417               | 0.015 | 0.524              | 0.057 |
| <i>L. bulgaricus</i> LB21   | DFF                 | 0.372               | 0.017 | 0.537              | 0.028 |
| <i>L. bulgaricus</i> YB1    | DFF                 | 0.386               | 0.024 | 0.546              | 0.006 |
| <i>L. bulgaricus</i> B440   | NRRL                | 0.542               | 0.067 | 0.636              | 0.070 |
| <i>L. casei</i> 4646        | ATCC                | 1.579               | 0.093 | 1.609              | 0.141 |
| <i>L. casei</i> LC2         | DFF                 | 1.608               | 0.097 | 1.644              | 0.085 |
| <i>L. casei</i> 393         | ATCC                | 0.630               | 0.019 | 0.780              | 0.028 |
| <i>L. casei</i> B1922       | NRRL                | 0.513               | 0.025 | 0.655              | 0.064 |
| <i>L. casei</i> B441        | NRRL                | 1.235               | 0.416 | 1.469              | 0.357 |
| <i>L. casei</i> LC3         | DFF                 | 1.617               | 0.076 | 1.686              | 0.062 |

---

|                                                   |      |       |       |       |       |
|---------------------------------------------------|------|-------|-------|-------|-------|
| <i>L. casei</i> B1255                             | NRRL | 0.593 | 0.039 | 0.634 | 0.120 |
| <i>L. rhamnosus</i> EV2                           | DFF  | 0.509 | 0.011 | 0.624 | 0.032 |
| <i>L. rhamnosus</i> B442                          | NRRL | 0.513 | 0.013 | 0.603 | 0.072 |
| <i>L. coryniformis</i> ssp. <i>torquens</i> B4390 | NRRL | 0.526 | 0.107 | 1.619 | 0.640 |
| <i>L. curvatus</i> B4562                          | NRRL | 0.430 | 0.041 | 0.527 | 0.058 |
| <i>L. delbrueckii</i> ssp. <i>lactis</i> B735     | NRRL | 0.596 | 0.054 | 0.731 | 0.193 |
| <i>L. delbrueckii</i> B443                        | NRRL | 0.742 | 0.292 | 0.719 | 0.063 |
| <i>L. delbrueckii</i> B1658                       | NRRL | 0.745 | 0.042 | 0.855 | 0.033 |
| <i>L. delbrueckii</i> ssp. <i>lactis</i> B736     | NRRL | 0.916 | 0.415 | 0.826 | 0.053 |
| <i>L. delbrueckii</i> ssp. <i>lactis</i> B1844    | NRRL | 0.615 | 0.045 | 0.766 | 0.049 |
| <i>L. delbrueckii</i> ssp. <i>lactis</i> B1930    | NRRL | 0.536 | 0.023 | 0.632 | 0.064 |
| <i>L. delbrueckii</i> ssp. <i>lactis</i> B4523    | NRRL | 0.430 | 0.032 | 0.643 | 0.095 |
| <i>L. fermentum</i> B4525                         | NRRL | 0.569 | 0.022 | 0.686 | 0.066 |
| <i>L. farciminis</i> LF 25 (B4566)                | NRRL | 0.630 | 0.106 | 0.749 | 0.221 |
| <i>L. fermentum</i> B585                          | NRRL | 0.490 | 0.016 | 0.625 | 0.045 |
| <i>L. fermentum</i> B1925                         | NRRL | 0.605 | 0.012 | 0.723 | 0.170 |
| <i>L. fermentum</i> B14171                        | NRRL | 0.513 | 0.029 | 0.607 | 0.122 |
| <i>L. fructosus</i> 2041                          | DFF  | 0.536 | 0.026 | 0.656 | 0.106 |
| <i>L. gasseri</i> 1912                            | DFF  | 0.441 | 0.054 | 0.605 | 0.088 |
| <i>L. gasseri</i> 4240                            | DFF  | 0.498 | 0.004 | 0.663 | 0.044 |
| <i>L. gasseri</i> 14175                           | DFF  | 0.479 | 0.035 | 0.553 | 0.062 |
| <i>L. helveticus</i> B4526                        | NRRL | 0.377 | 0.130 | 0.403 | 0.065 |
| <i>L. helveticus</i> EV1                          | DFF  | 0.573 | 0.016 | 0.674 | 0.078 |
| <i>L. helveticus</i> B1842                        | NRRL | 1.661 | 0.040 | 1.716 | 0.101 |
| <i>L. helveticus</i> B1935                        | NRRL | 0.489 | 0.028 | 0.601 | 0.054 |
| <i>L. helveticus</i> B1942                        | NRRL | 0.630 | 0.037 | 0.858 | 0.017 |
| <i>L. helveticus</i> B1929                        | NRRL | 1.543 | 0.025 | 1.458 | 0.354 |
| <i>L. lactis</i> FARR                             | OSU  | 1.666 | 0.041 | 1.708 | 0.722 |
| <i>L. mali</i> B4563                              | NRRL | 1.638 | 0.087 | 1.665 | 0.059 |
| <i>L. paracasei</i> B4564                         | NRRL | 1.460 | 0.300 | 1.500 | 0.230 |
| <i>L. paraplantarum</i> B23115                    | NRRL | 1.060 | 0.681 | 1.482 | 0.470 |
| <i>L. plantarum</i> 14917                         | ATCC | 0.461 | 0.036 | 0.590 | 0.057 |
| <i>L. plantarum</i> NCDO955                       | DFF  | 0.468 | 0.045 | 0.622 | 0.063 |
| <i>L. plantarum</i> B4496                         | NRRL | 0.601 | 0.023 | 0.706 | 0.075 |
| <i>L. plantarum</i> B1846                         | NRRL | 0.422 | 0.017 | 0.540 | 0.041 |
| <i>L. plantarum</i> B1926                         | NRRL | 0.545 | 0.054 | 0.729 | 0.091 |
| <i>L. plantarum</i> TSH076                        | NRRL | 0.532 | 0.011 | 0.639 | 0.061 |
| <i>L. plantarum</i> BAA793                        | ATCC | 0.519 | 0.036 | 0.692 | 0.005 |
| <i>L. reuteri</i> 23272                           | ATCC | 0.611 | 0.039 | 0.680 | 0.109 |
| <i>L. rhamnosus</i> GG                            | ATCC | 0.440 | 0.219 | 0.562 | 0.316 |
| <i>L. rhamnosus</i> B176                          | NRRL | 0.551 | 0.031 | 0.608 | 0.023 |
| <i>L. rhamnosus</i> B1914                         | NRRL | 0.672 | 0.061 | 0.812 | 0.033 |
| <i>L. rhamnosus</i> B1937                         | NRRL | 0.626 | 0.048 | 0.642 | 0.045 |

|                                                   |            |       |       |       |       |
|---------------------------------------------------|------------|-------|-------|-------|-------|
| <i>L. rhamnosus</i> BLCR1                         | DFF        | 0.735 | 0.107 | 0.934 | 0.076 |
| <i>L. ruminus</i> 14583                           | DFF        | 0.689 | 0.086 | 0.860 | 0.045 |
| <i>L. salivarius</i> ssp. <i>salivarius</i> B1949 | NRRL       | 0.808 | 0.038 | 0.948 | 0.207 |
| <i>L. salivarius</i> ssp. <i>salicinus</i> B1950  | NRRL       | 0.613 | 0.185 | 0.590 | 0.256 |
| <i>L. sharpeae</i> B14855                         | NRRL       | 0.699 | 0.123 | 0.884 | 0.416 |
| <i>L. (Weissella) viridescens</i> B1951           | NRRL       | 0.703 | 0.091 | 0.852 | 0.024 |
| <i>L. (Weissella) confusa</i> B1064               | NRRL       | 0.703 | 0.125 | 0.872 | 0.059 |
| <i>L. acidophilus</i> 1426                        | Luchansky  | 1.635 | 0.036 | 1.678 | 0.044 |
| <i>L. reuteri</i> 1428                            | Luchansky  | 1.590 | 0.098 | 1.664 | 0.035 |
| <i>Bifidobacterium breve</i> 2141                 | ATCC 15698 | 1.674 | 0.082 | 1.716 | 0.095 |

<sup>1</sup>Source for bacterial cultures used in this study: DFF: Dairy and Functional Foods Research Unit, Eastern Regional Research Center, U.S. Department of Agriculture, Wyndmoor, PA; NRRL: Northern Regional Research Center, The National Center for Agriculture Utilization Research, U.S. Department of Agriculture, Peoria, IL; ATCC: American Type Culture Collection, Rockville, MD; OSU: Oregon State University, gift from W. E. Sandine; Luchansky: John Luchansky, Eastern Regional Research Center, U.S. Department of Agriculture, Wyndmoor, PA, ATCC: American Type Culture Collection

<sup>2</sup>OD600: Optical Density (600nm) after 18-24 h growth at 32°C under anaerobic growth conditions ± the standard deviation (SD).
